# Supplementary material for: Disagreement in F ST estimators: A case study from sex chromosomes
Source: PubMed Central journal article supplement (PMC7689734; doi:10.1111/1755-0998.13210), 2020-07-06

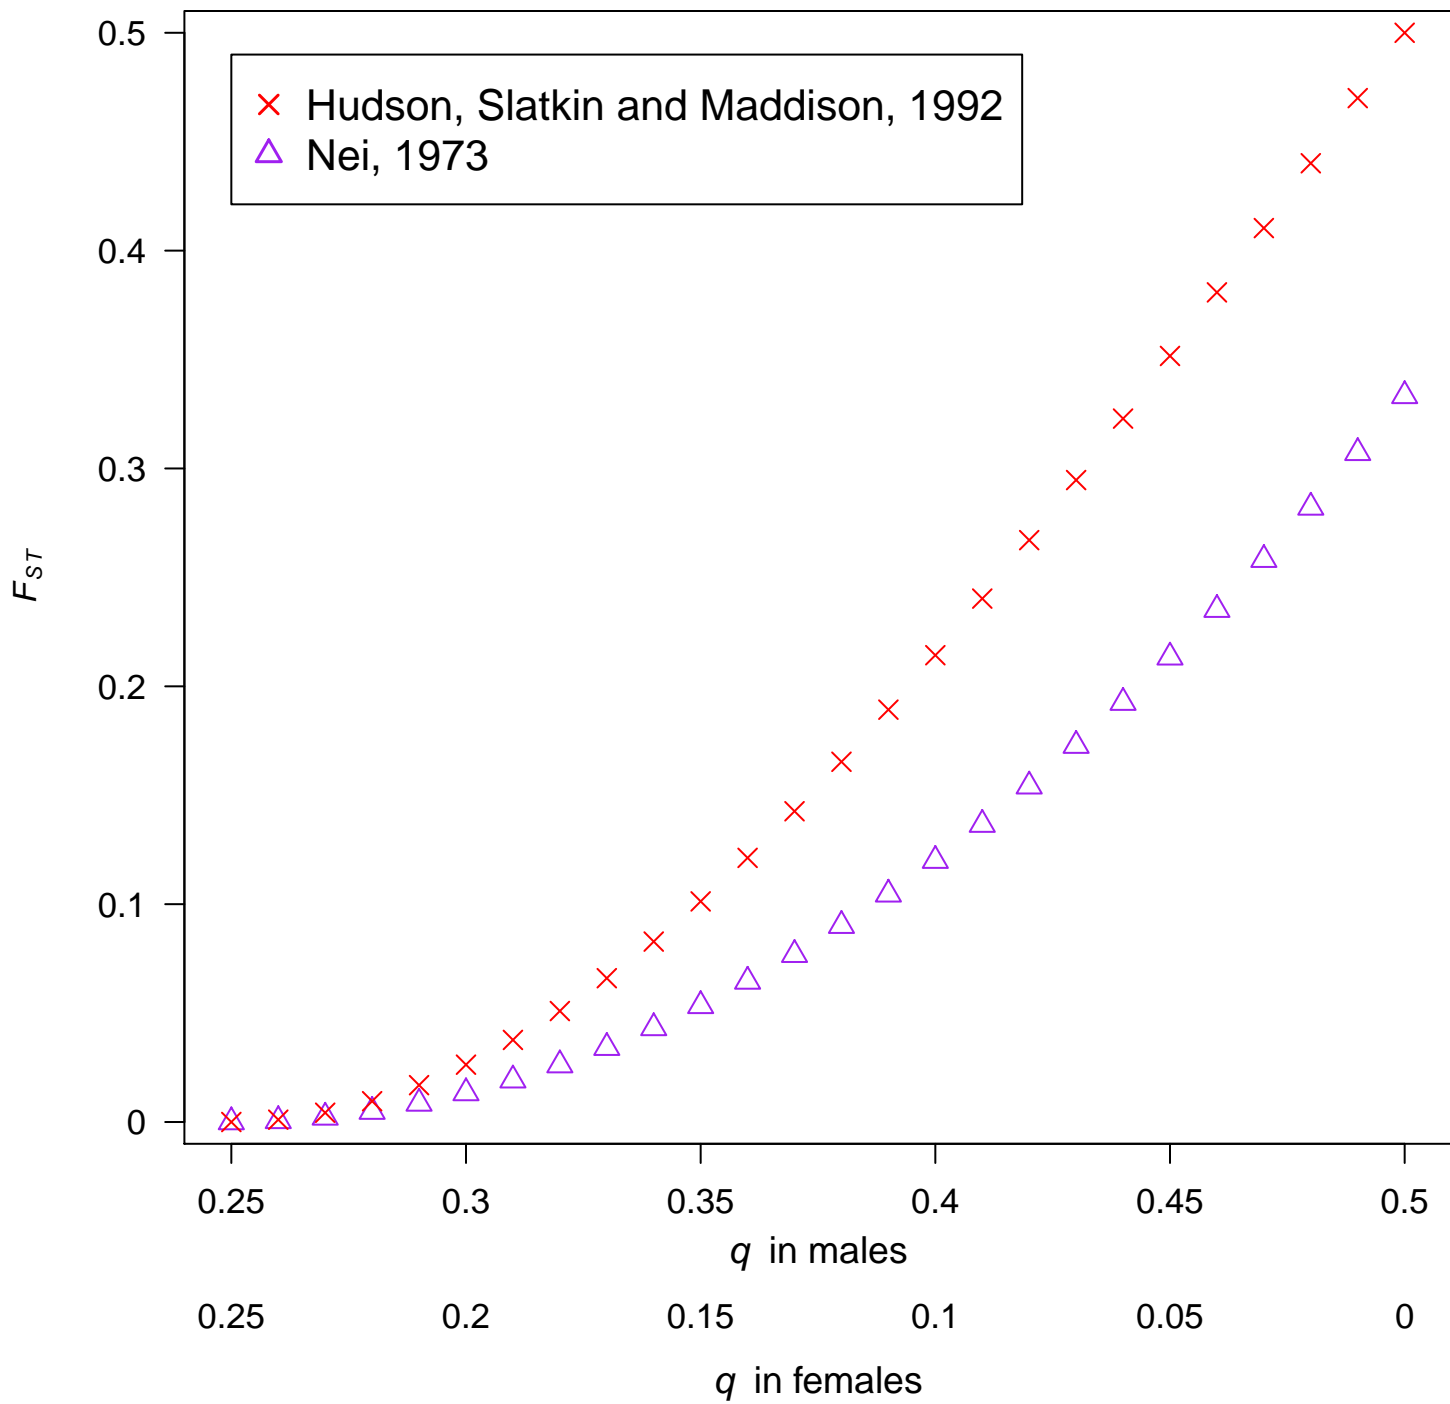

Supplement: MEN-20-1517-s001.pdf [file MEN-20-1517-s001.pdf]
